# Supplementary material for: Longitudinal Evaluation of Neuromuscular Dysfunction in Long-term Survivors of Childhood Cancer: A Report from the Childhood Cancer Survivor Study
Source: Oxford University Press journal article supplement (doi:10.1158/1055-9965.epi-21-0154), 2021-06-07
Supplement: 10559965epi210154-sup-260205_2_supp_7094641_qsjrgk.docx [file 10559965epi210154-sup-260205_2_supp_7094641_qsjrgk.docx]

**Supplemental Table 2:** Prevalence ratios of adverse health and socioeconomic outcomes in survivors with neuromuscular dysfunction excluding survivors with CNS tumors, cranial/spinal radiotherapy or lower limb amputation

|  | Survivors with Neuromuscular Dysfunction  n (%)a | Survivors without Neuromuscular Dysfunction  n (%)a | PRb (95% CI) | P Value |
| --- | --- | --- | --- | --- |
| Emotional Distress  Anxietyc  Depressionc | 372 (14.1)  439 (16.6) | 475 (4.9)  742 (7.9) | 2.97 (2.54 to 3.47)  2.20 (1.93 to 2.51) | <0.001  <0.001 |
| Obesity | 840 (25.1) | 2381 (20.9) | 1.16 (1.07 to 1.26) | 0.0002 |
| Activity limitation | 1088 (31.0) | 1130 (8.7) | 2.69 (2.47 to 2.93) | <0.001 |
| Frailty | 1647 (60.3) | 2987 (34.8) | 1.50 (1.44 to 1.57) | <0.001 |
| College or higher degreed | 2092 (74.0) | 6659 (77.7) | 0.94 (0.92 to 0.97) | <0.001 |
| Employment d  Currently employed  Unable to work due to disability | 2047 (76.6)  620 (23.2) | 7420 (90.9)  502 (6.3) | 0.87 (0.85-0.89)  3.01 (2.65-3.41) | <0.001  <0.001 |

aPercentages considered the sample weight

bReference is survivors without neuromuscular dysfunction. Each outcome was analyzed in a separate log-binomial regression model adjusted for sex, race, ethnicity, age at the assessment and presence of severe, disabling, or life threatening chronic conditions.

cIncludes survivors 18 years of age or older

dIncludes survivors 25 years of age or older

Abbreviations: PR, prevalence ratio, CNS, central nervous system
